# Supplementary material for: Aminated graphene quantum dots/CdS nanobelts for enhanced photocatalytic degradation of RhB dye under visible light
Source: Royal Society of Chemistry journal article supplement (doi:10.1039/d3ra06454a), 2024-01-01
Supplement: d3ra06454a1.pdf [file d3ra06454a1.pdf]

## Supporting Information

### **Aminated Graphene Quantum Dots/CdS Nanobelts for Enhanced Photocatalytic Degradation of RhB Dye under Visible Light**

Xiangfeng Lin<sup>1,2\*</sup>, Yu Chen<sup>1,2</sup>, Diwen Zhou<sup>3</sup>, Menglin Chen<sup>1,2,\*</sup>, Weixia Liang<sup>4\*</sup>,  
Huazhang Guo<sup>3\*</sup>

<sup>1</sup>Key Laboratory of Ecology of Rare and Endangered Species and Environmental Protection (Guangxi Normal University, Ministry of Education, Guilin 541004, PR China)

<sup>2</sup>School of Environment and Resource, Guangxi Normal University, Guilin 541004, PR China

<sup>3</sup>School of Environmental and Chemical Engineering, Shanghai University, Shanghai 200444, PR China

<sup>4</sup>School of Medicine and Health, Guangxi Vocational & Technical Institute of Industry, Nanning 530001, China

\*Correspondence: 310976435@qq.com; mlchen99@163.com; liangwxabc@163.com; guohuazhang@shu.edu.cn

The supporting information file includes 3 Pages and 3 Figures.

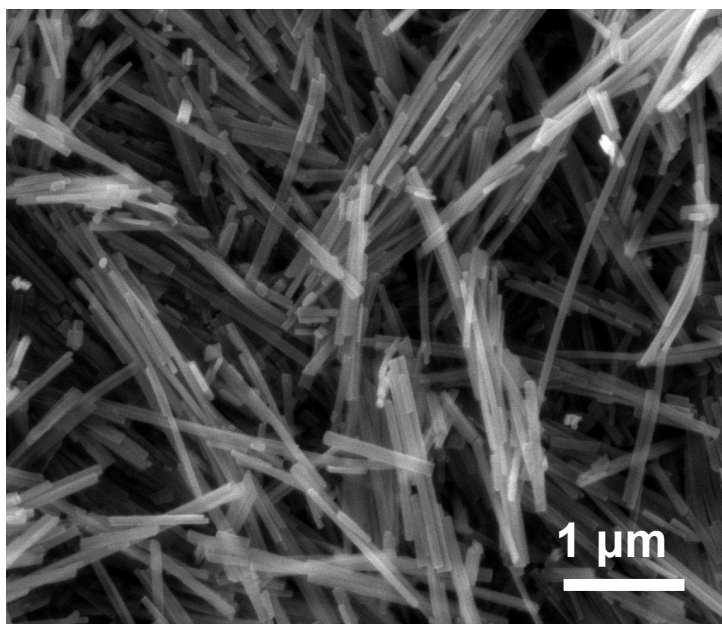

**Figure S1** SEM image of CdS nanobelt.

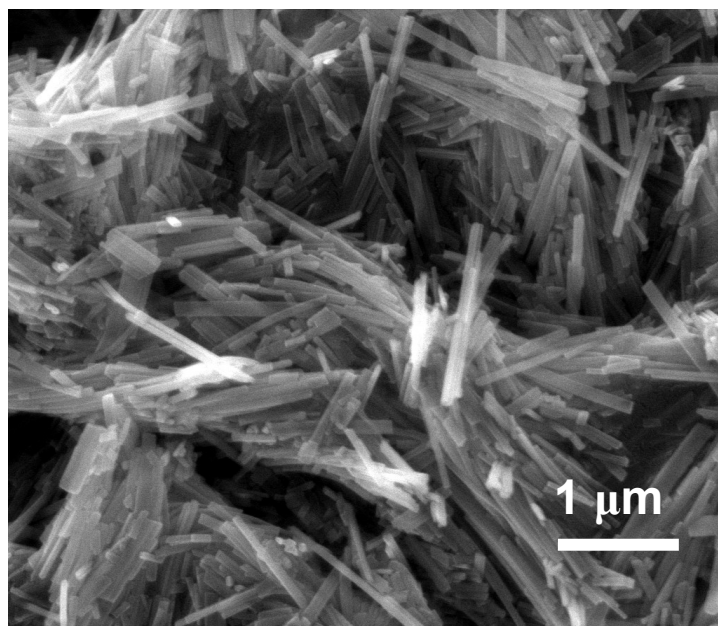

**Figure S2** SEM image of CdS-4.

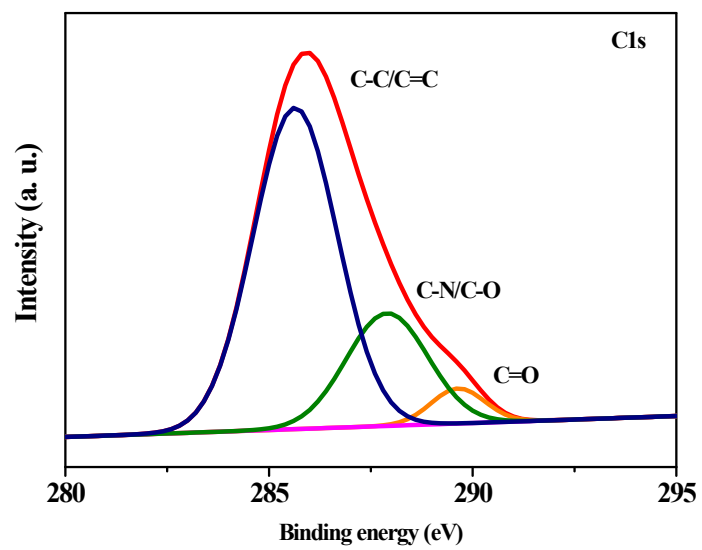

**Figure S3** High-resolution XPS spectra of C1s of CdS-4 composite.
